# Supplementary material for: LncRNA BCYRN1-induced autophagy enhances asparaginase resistance in extranodal NK/T-cell lymphoma
Source: PubMed Central journal article supplement (PMC7738865; doi:10.7150/thno.46655), 2021-01-01

1 Figure S1. Impact of BCYRN1 on cell apoptosis and cell cycle distribution in SNK-  
2 6 cell line.

3 A. The cell apoptosis was evaluated by annexin V/propidium iodide staining and  
4 quantified by the flow cytometry. B. The cell apoptosis was observed by Hoechst  
5 33258 staining (The nuclei of apoptotic cells are bright blue and lobulated or  
6 fragmented). C. The cell cycle distribution was measured and quantified by flow  
7 cytometry analysis. Control means normal SNK-6 cell lines; Mock indicates the  
8 SNK-6 cells transfected with empty virus vectors. BCYRN1 means SNK-6 cells  
9 transfected with BCYRN1-overexpressed lentivirus. shBCYRN1 means SNK-6 cells  
10 transfected with BCYRN1-knockdown lentivirus.

11 Figure S2. Impact of BCYRN1 on drug resistance of SNK-6 cells to asparaginase.

12 A. The cell apoptosis was evaluated by flow cytometry analysis using annexin  
13 V/propidium iodide staining. B. The cell apoptosis was demonstrated by Hoechst  
14 33258 staining (The nuclei of apoptotic cells are bright blue and lobulated or  
15 fragmented). C. The cell cycle distribution was measured by flow cytometry  
16 analysis. Control means normal SNK-6 cell lines; Mock indicates the SNK-6 cells  
17 transfected with empty virus vectors. BCYRN1 means SNK-6 cells transfected with  
18 BCYRN1-overexpressed lentivirus. shBCYRN1 means SNK-6 cells transfected with  
19 BCYRN1-knockdown lentivirus. L-ASP means SNK-6 cells treated with  
20 asparaginase.

21 Figure S3. Overexpression of p53 or autophagy inhibitors inhibit BCYRN1-induced  
22 autophagy.

23 A, B, and C. The cell viability and proliferation was measured by CCK8 (A, B) and  
24 clone formation experiment (C) in different groups of SNK-6 cells. D. The cell cycle  
25 distribution was measured and quantified by flow cytometry analysis. E, and F. The  
26 cell apoptosis was quantified by the flow cytometry (E) and Hoechst 33258  
27 staining (F) (The nuclei of apoptotic cells are bright blue and lobulated or  
28 fragmented). H. Cell autophagy was analyzed by immunofluorescence assay with  
29 adenovirus expressing GFP-LC3B fusion protein (Ad-GFP-LC3B) in different  
30 groups of SNK-6 cells. Nuclei was stained blue with DAPI, and LC3B was shown in  
31 green. BCYRN1 means SNK-6 cells transfected with BCYRN1-overexpressed  
32 lentivirus. L-ASP means SNK-6 cells treated with asparaginase. p53 means  
33 BCYRN1-overexpressed SNK-6 cells transfected with pcDNA3.1-p53 plasmid. CQ  
34 means SNK-6 cells treated with Chloroquine (CQ). Rapa means SNK-6 cells  
35 treated with Rapa. In B and F, different letters represent significant differences  
36 between groups.  
37

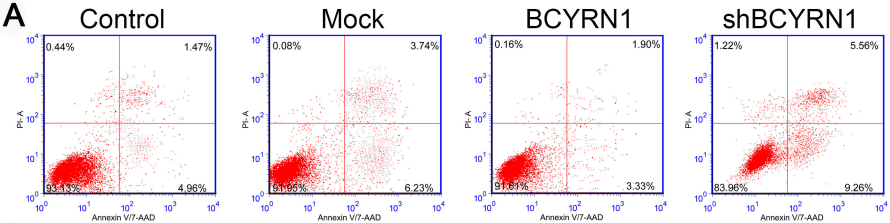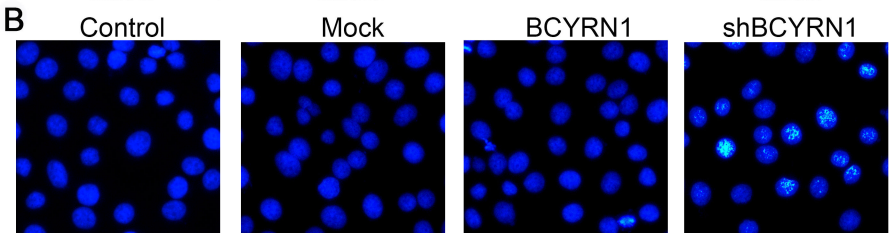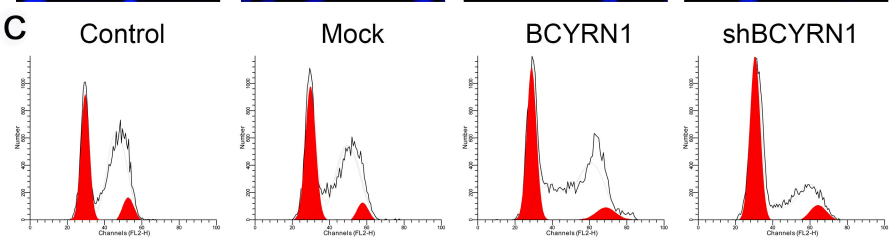

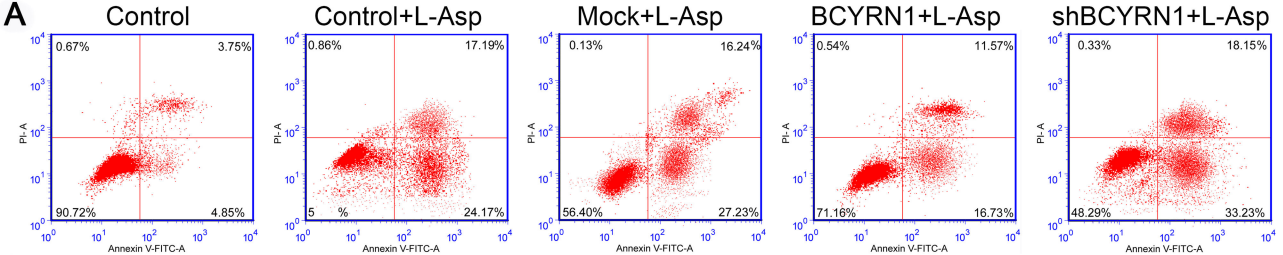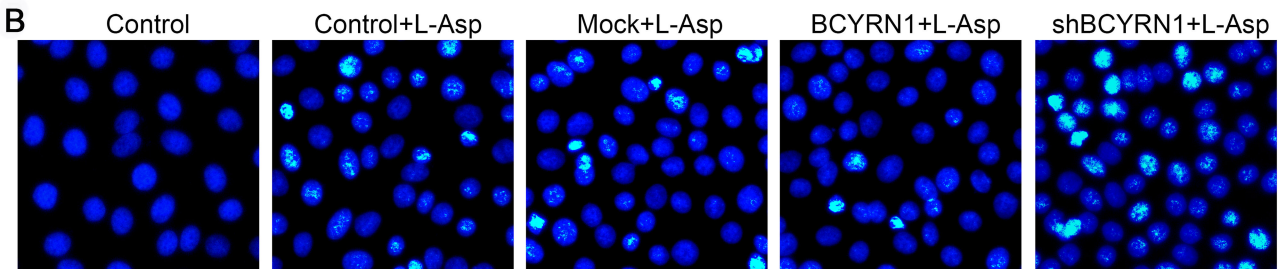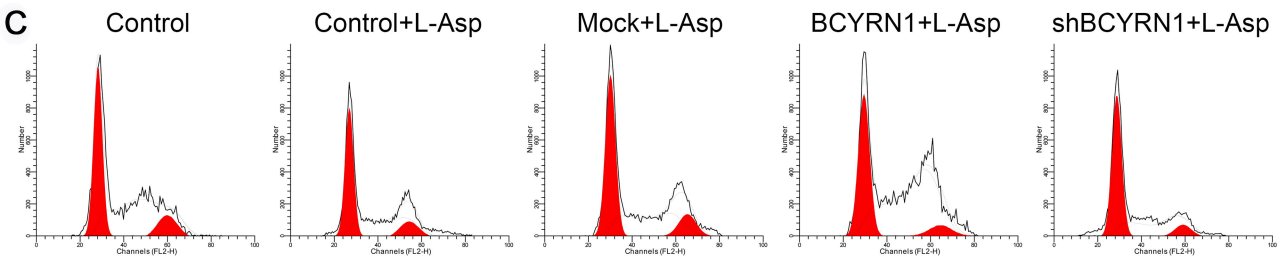

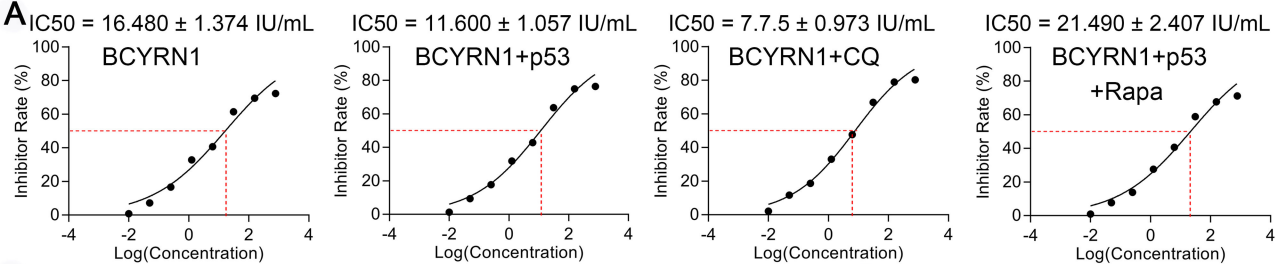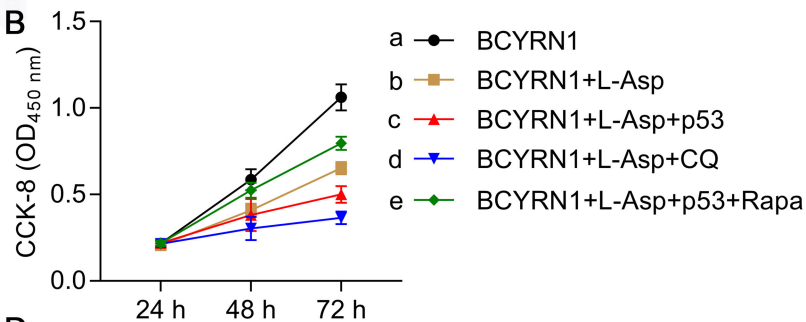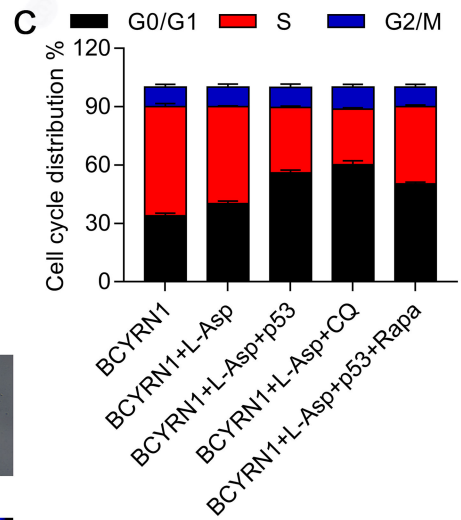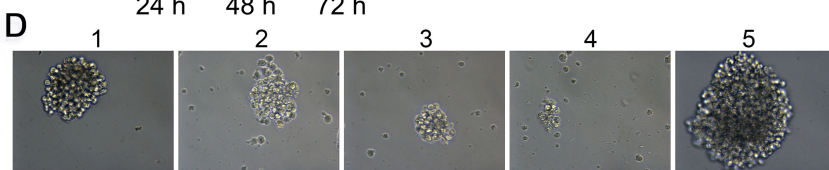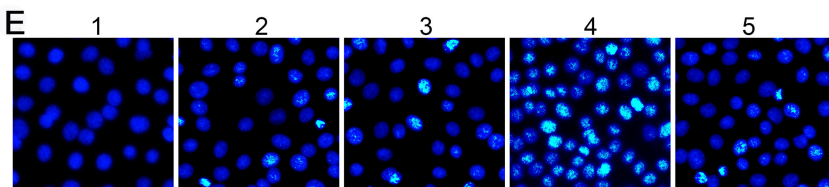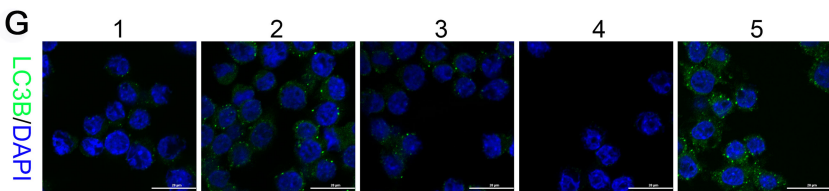

1: BCYRN1    2: BCYRN1+L-Asp    3: BCYRN1+L-Asp+p53  
 4: BCYRN1+L-Asp+CQ    5: BCYRN1+L-Asp+p53+Rapa

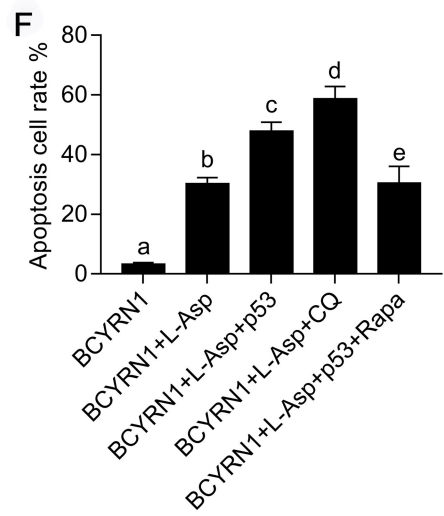

Supplement: thnov11p0925s1.pdf [file thnov11p0925s1.pdf]
